# Supplementary material for: Achieving structural stability and enhanced electrochemical performance through Nb-doping into Li- and Mn-rich layered cathode for lithium-ion batteries
Source: Royal Society of Chemistry journal article supplement (doi:10.1039/d2mh01254e), 2023-01-01
Supplement: d2mh01254e1.pdf [file d2mh01254e1.pdf]

## Supplementary information

### **Achieving structural stability and enhanced electrochemical performance through Nb-doping into Li- and Mn-rich layered cathode for lithium-ion batteries**

Soyeong Yun<sup>a, ‡</sup>, Junwoo Yu<sup>a, ‡</sup>, Wontae Lee<sup>a</sup>, Hayeon Lee<sup>a</sup>, Won-Sub Yoon<sup>a, b, \*</sup>

<sup>a</sup> Department of Energy Science, Sungkyunkwan University, Suwon, 16419, Republic of Korea.

<sup>b</sup> SKKU Institute of Energy Science and Technology (SIEST), Sungkyunkwan University, Suwon, 16419, Republic of Korea.

<sup>‡</sup> These authors contributed equally: Soyeong Yun, Junwoo Yu

\* Correspondence to: [wsyoon@skku.edu](mailto:wsyoon@skku.edu)

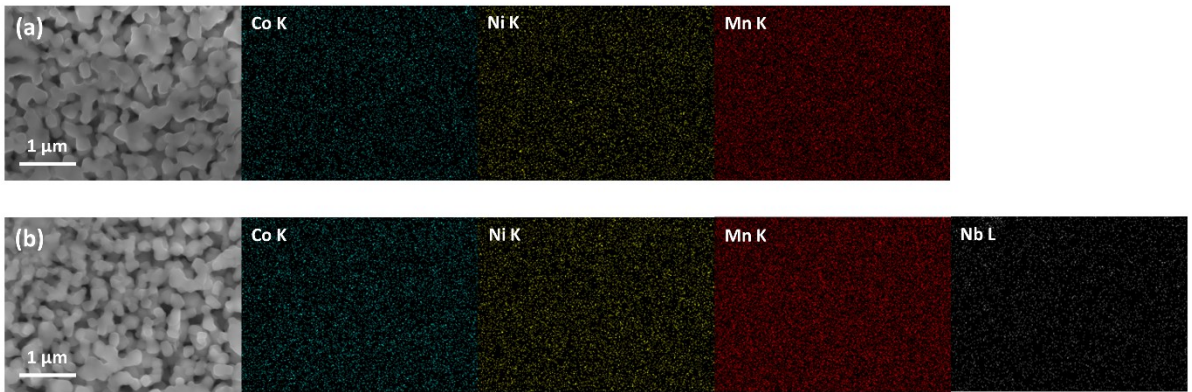

**Fig. S1.** Magnified cross-section SEM image of pristine (a) LNCM and (b) Nb-LNCM materials with EDS elemental mapping results of Co, Ni, Mn, and Nb.

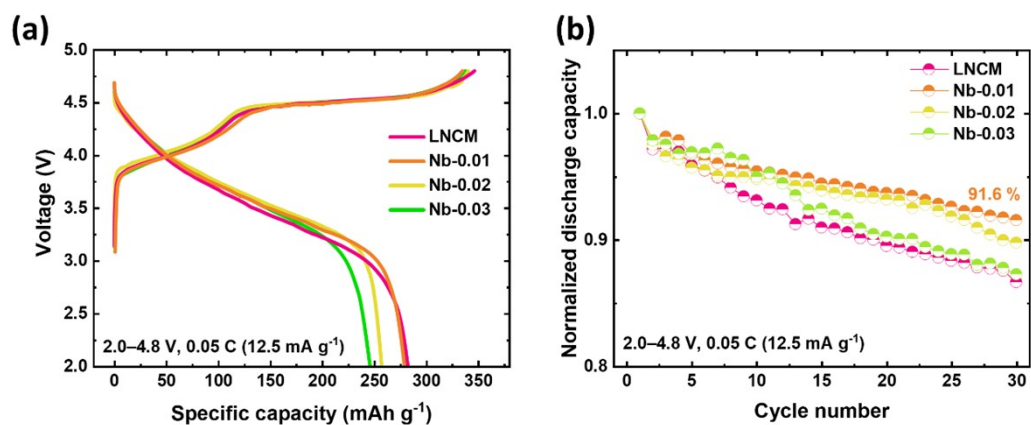

**Fig. S2.** (a) The voltage curves of LNCM and Nb-LNCM (0.01, 0.02, and 0.03 moles of Nb in LNCM) at a current rate of 0.05 C and in a voltage range of 2.0–4.8 V. (b) Normalized capacity retention of LNCM and Nb-LNCM (0.01, 0.02, and 0.03 moles of Nb in LNCM) at a current rate of 0.05 C and in a voltage range of 2.0–4.8 V.

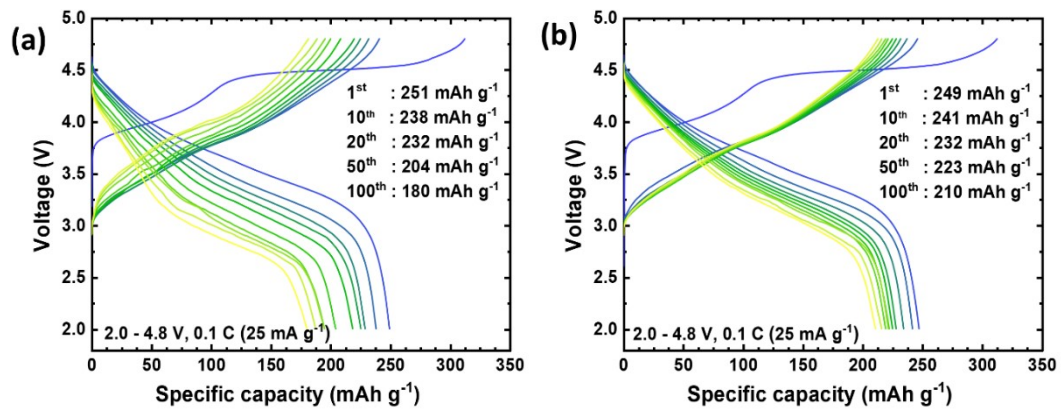

**Fig. S3.** Electrochemical voltage profiles of (a) LNCM and (b) Nb-LNCM at a current rate of 0.1 C in a voltage range of 2.0–4.8 V.

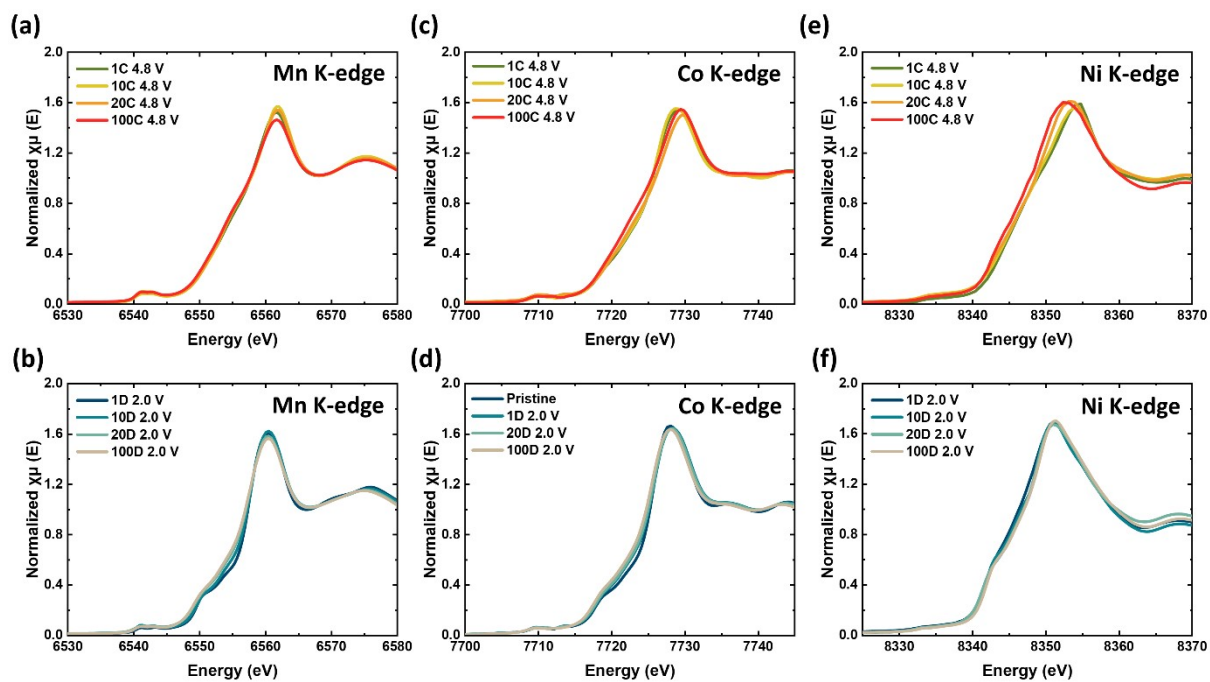

**Fig. S4.** Normalized Mn, Co, and Ni K-edge XANES spectra of LNCM cathode material (a, c, e) during charge and (b, d, f) discharge in the 1<sup>st</sup>, 10<sup>th</sup>, 20<sup>th</sup>, and 100<sup>th</sup> cycles.

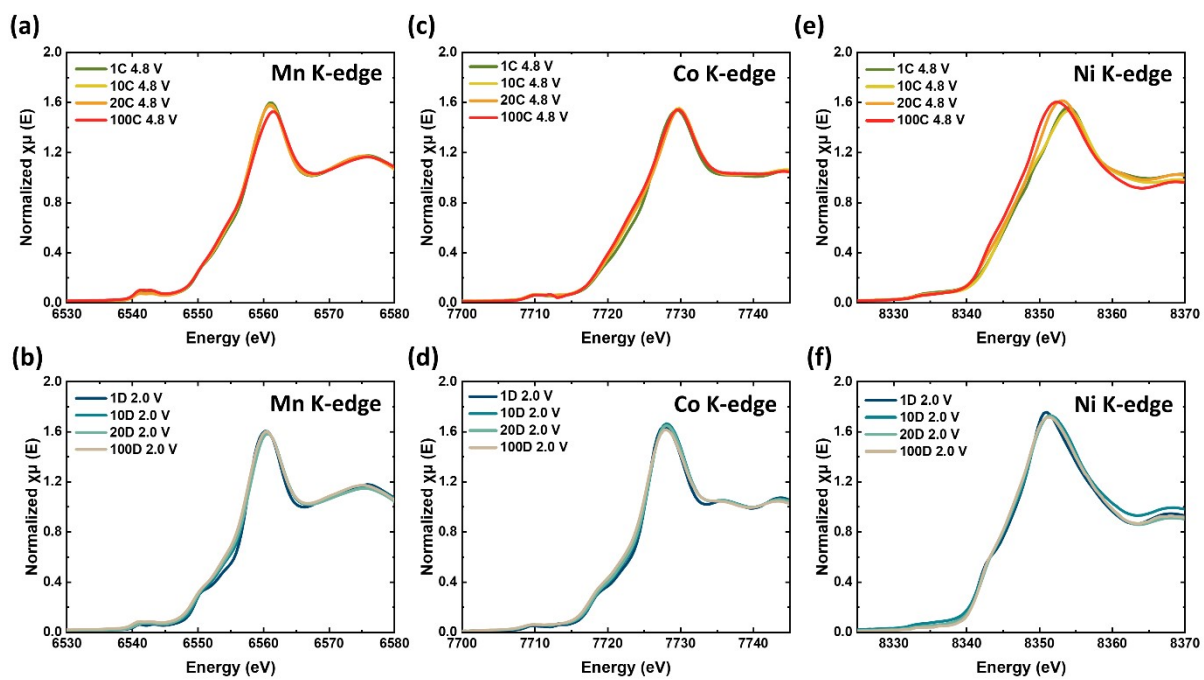

**Fig. S5.** Normalized Mn, Co, and Ni K-edge XANES spectra of Nb-LNCM cathode material

(a, c, e) during charge and (b, d, f) discharge in the 1<sup>st</sup>, 10<sup>th</sup>, 20<sup>th</sup>, and 100<sup>th</sup> cycles.

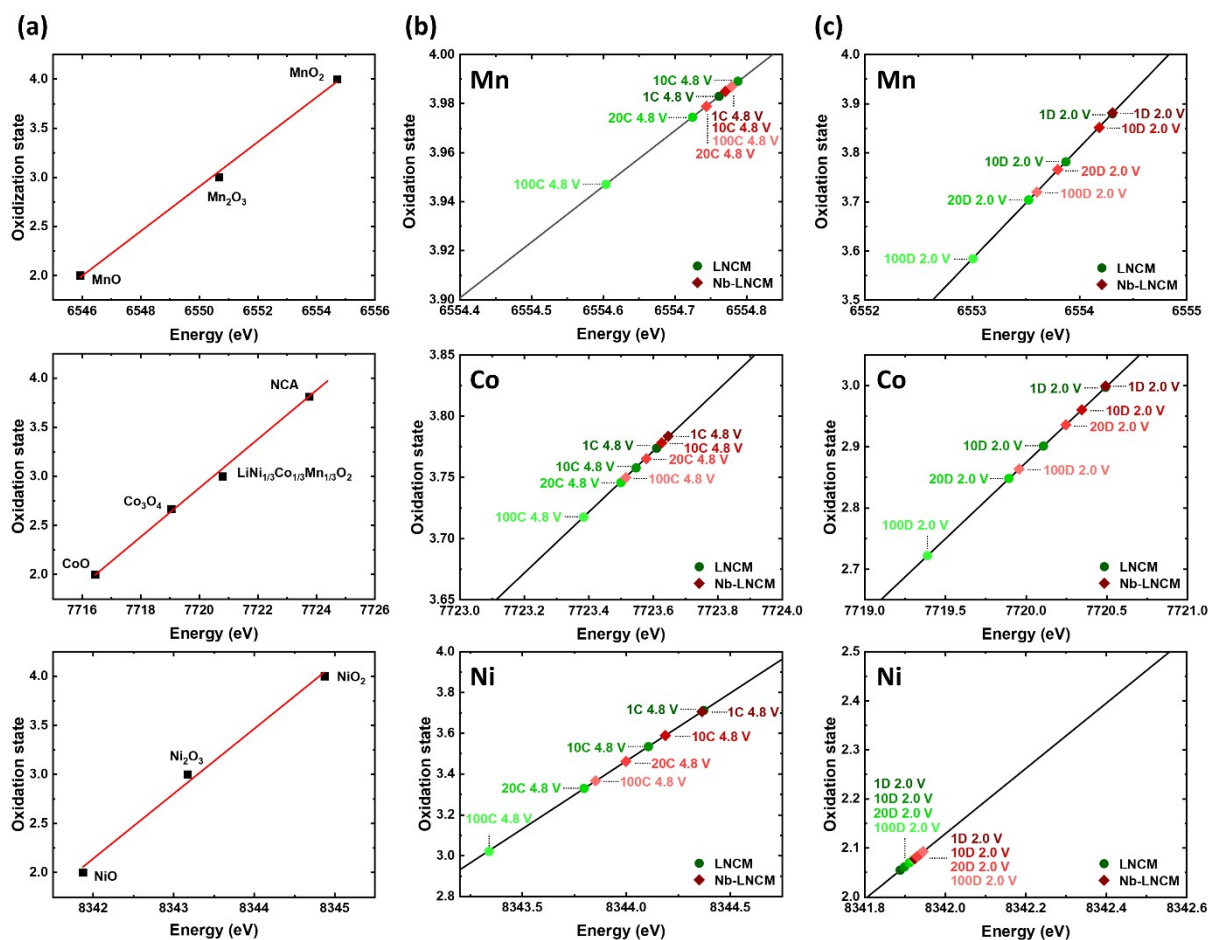

**Fig. S6.** (a) The relationship between the oxidation states and Mn, Co, and Ni K-edge XANES energy calculated by an integral method. Variations in the oxidation states of Mn, Co, and Ni of LNCM and Nb-LNCM between the (b) charge and (c) discharge process in the 1<sup>st</sup>, 10<sup>th</sup>, 20<sup>th</sup>, and 100<sup>th</sup> cycles, which are calculated by the integral method of XANES spectra.

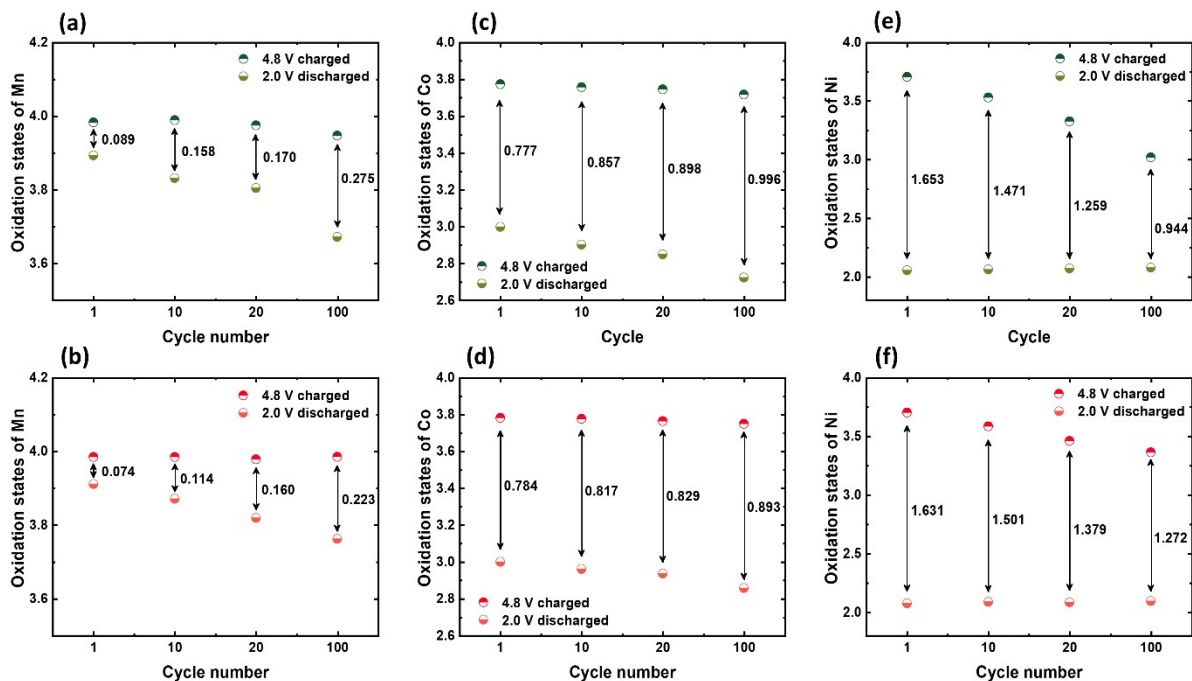

**Fig. S7.** Variations in the oxidation states of (a) Mn, (c) Co, and (e) Ni ions in LNCM, and (b) Mn, (d) Co, (f) Ni ions in Nb-LNCM between the charge-discharge process in the 1<sup>st</sup>, 10<sup>th</sup>, 20<sup>th</sup>, and 100<sup>th</sup> cycles, which are calculated by the integral method of XANES spectra of each transition metal.



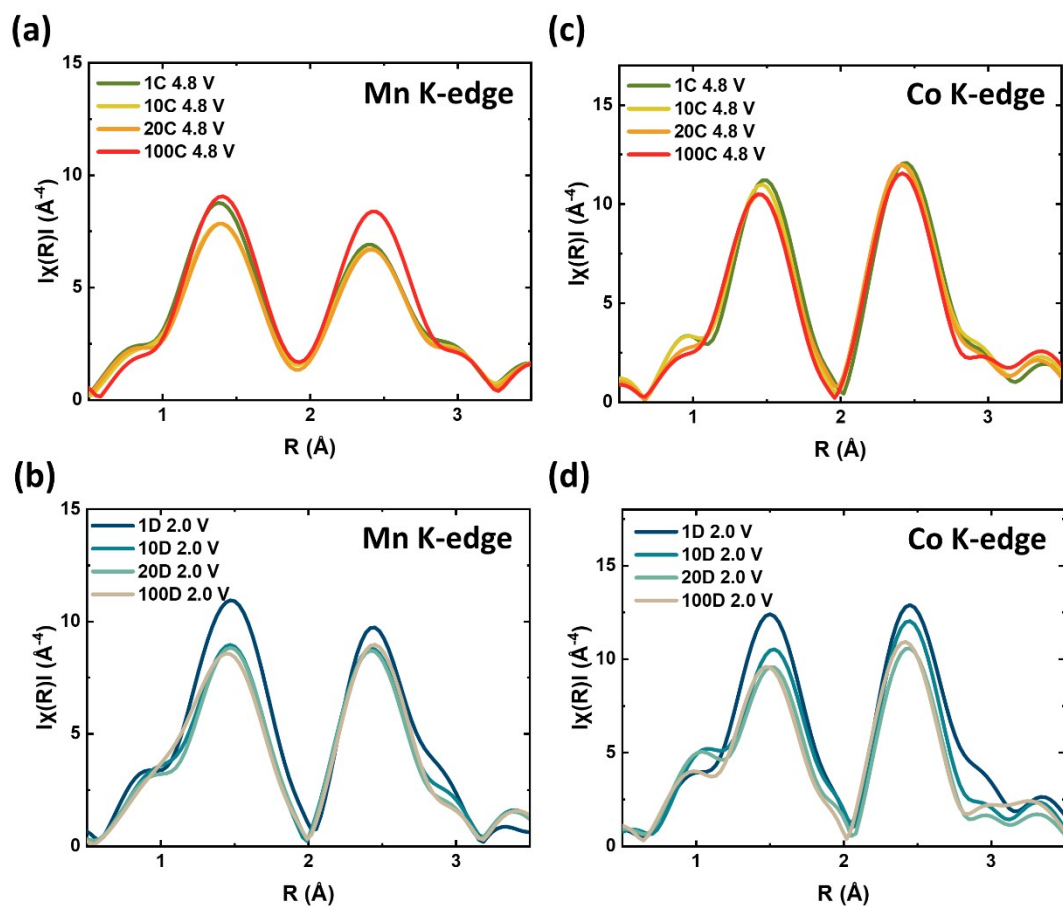

**Fig. S8.**  $k^3$ -weighted Mn and Co K-edge EXAFS spectra of LNCM cathode material (a, c) during charge and (b, d) discharge in the 1<sup>st</sup>, 10<sup>th</sup>, 20<sup>th</sup>, and 100<sup>th</sup> cycles.

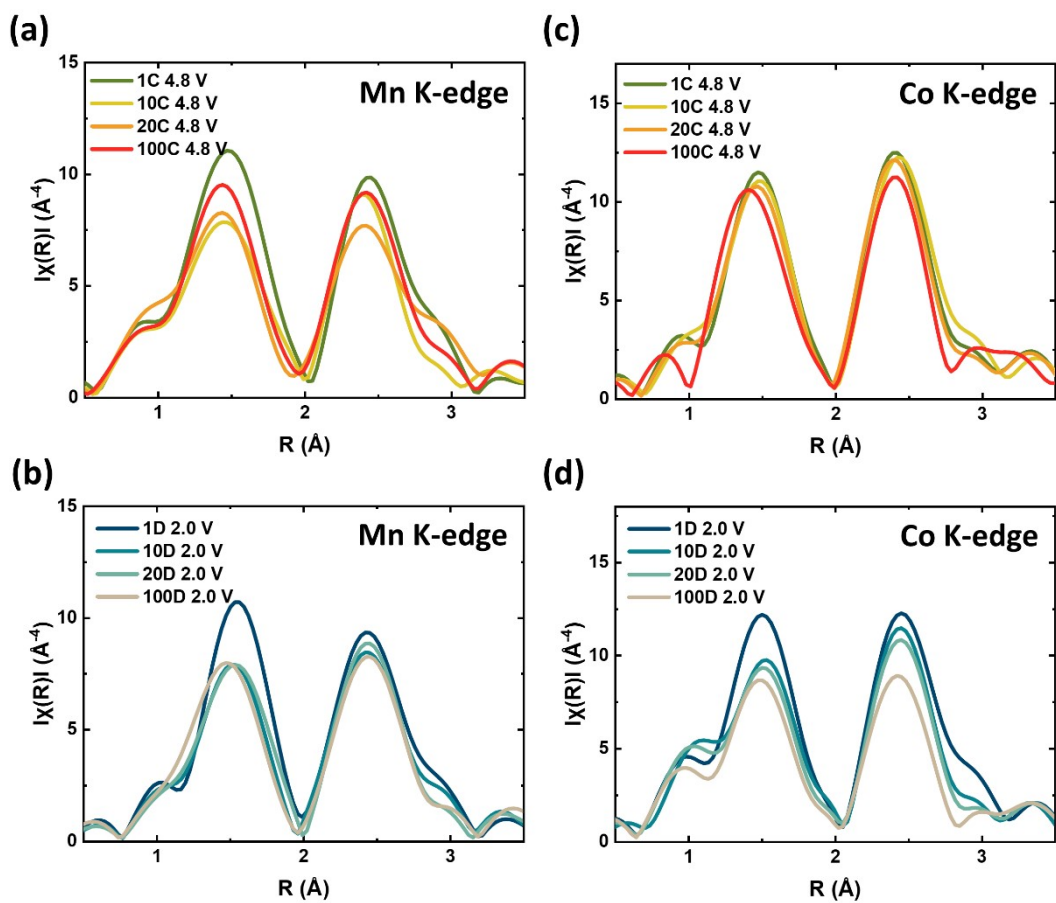

**Fig. S9.**  $k^3$ -weighted Mn and Co K-edge EXAFS spectra of Nb-LNCM cathode material (a, c) during charge and (b, d) discharge in the 1<sup>st</sup>, 10<sup>th</sup>, 20<sup>th</sup>, and 100<sup>th</sup> cycles.

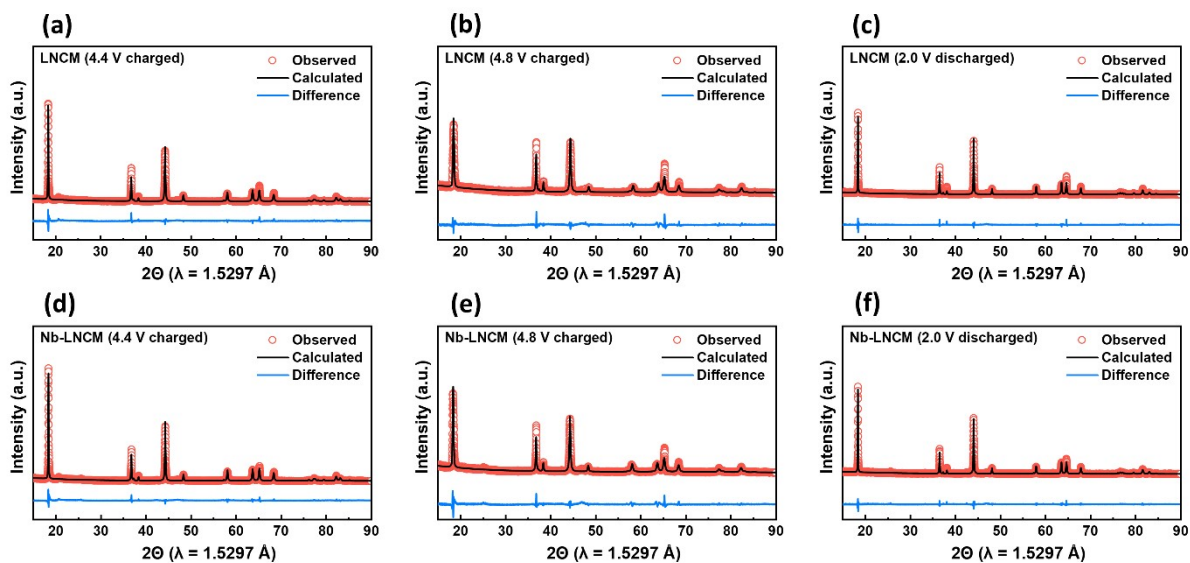

**Fig. S10.** HRPD patterns: observed, calculated, and difference of (a) 4.4 V charged, (b) 4.8 V charged, and (c) 2.0 V discharged states of LNCM and those of (d) 4.4 V charged, (e) 4.8 V charged, and (f) 2.0 V discharged states of Nb-LNCM.

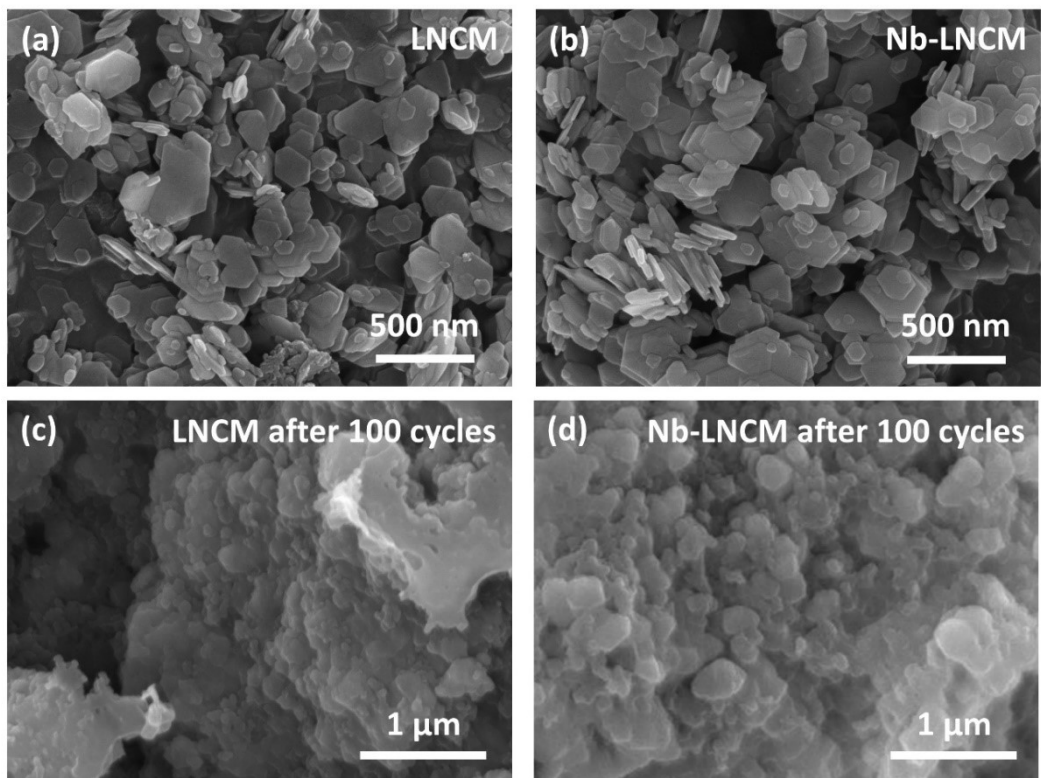

**Fig. S11.** SEM images of pristine (a) LNCM and (b) Nb-LNCM powders and (c) LNCM and (d) Nb-LNCM electrodes after 100 cycles.

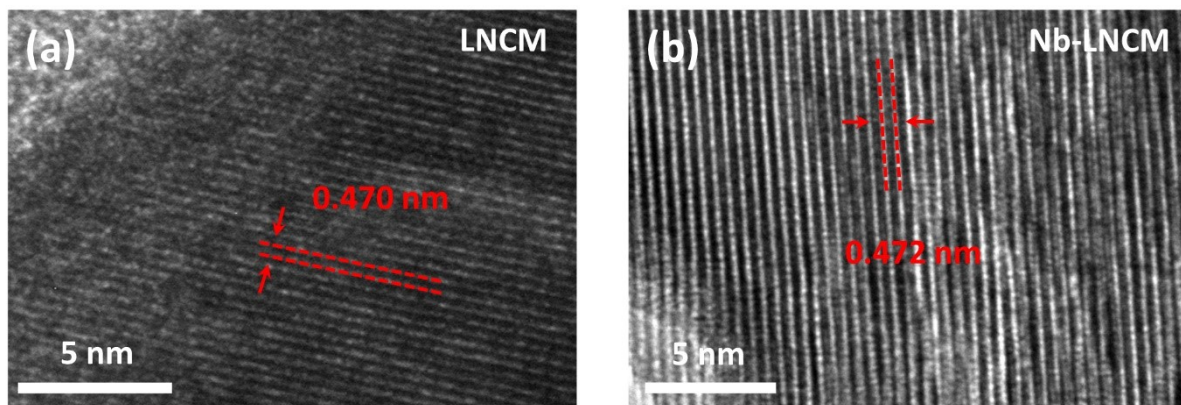

**Fig. S12.** HRTEM images of (a) LNCM and (b) Nb-LNCM in the pristine state.

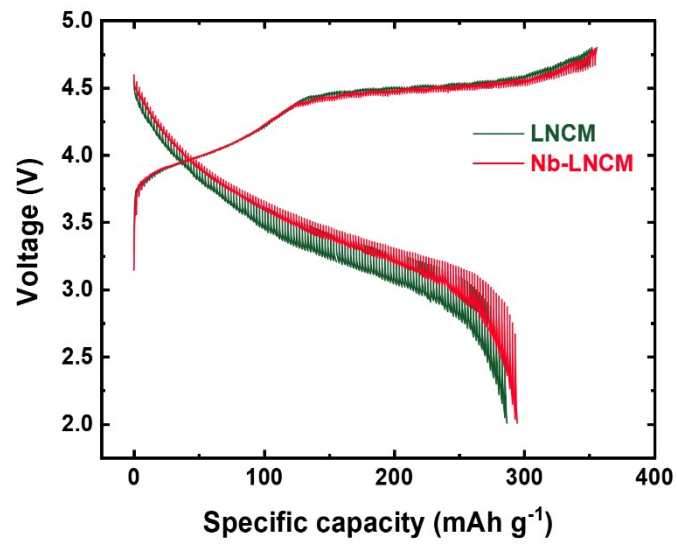

**Fig. S13.** GITT curves of LNCM and Nb-LNCM in the voltage range of 2.0–4.8 V at a current rate of 0.1 C during the first cycle.

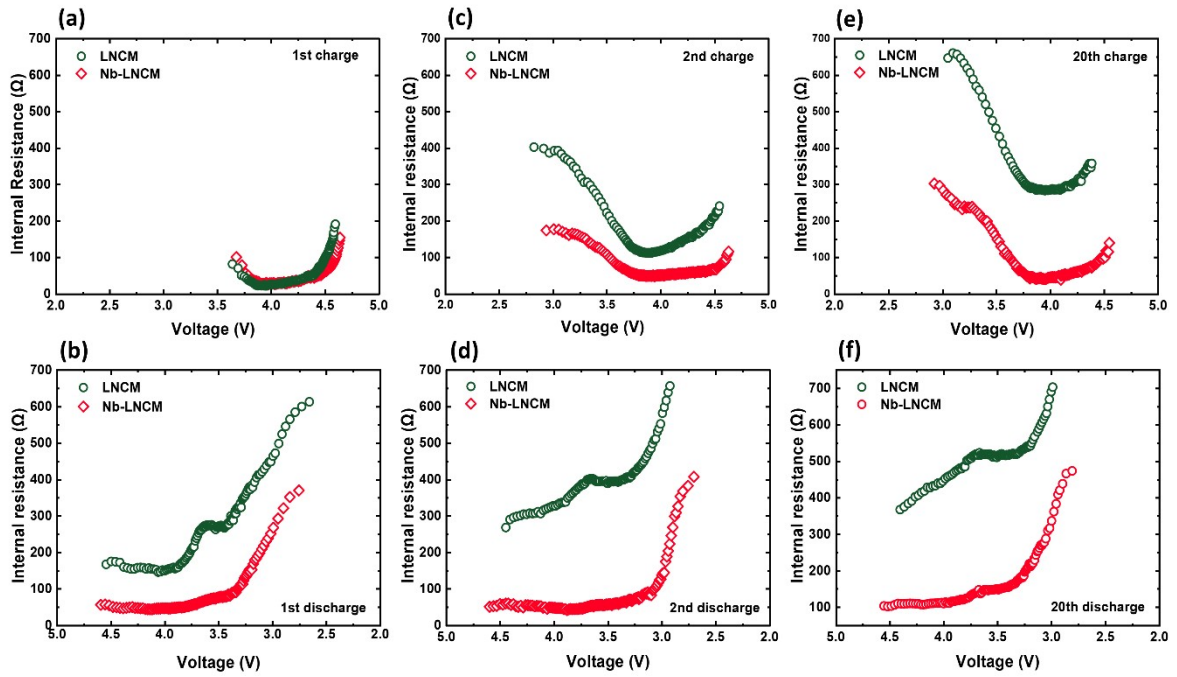

**Fig. S14.** Internal resistance calculated by the GITT curve of LNCM and Nb-LNCM during the 1<sup>st</sup> (a) charge and (b) discharge, 2<sup>nd</sup> (c) charge and (d) discharge, and 20<sup>th</sup> (e) charge and (f) discharge.

**Table S1.** The refined lattice parameters and reliability factors of Nb-LNCM when Nb<sup>5+</sup> ion occupied the 3b sites (Li layer).

| <b>Concentration<br/>of Nb</b> | $a_{hex}$ (Å) | $c_{hex}$ (Å) | V (Å <sup>3</sup> ) | <b>Occupancy<br/>(Nb<sup>5+</sup> in 3b)</b> | <b>S<br/>(R<sub>wp</sub>/R<sub>exp</sub>)</b> | <b>R<sub>p</sub></b> | <b>R<sub>wp</sub></b> |
|--------------------------------|---------------|---------------|---------------------|----------------------------------------------|-----------------------------------------------|----------------------|-----------------------|
| <b>0.01</b>                    | 2.8509(2)     | 14.2337(2)    | 100.187             | 0                                            | 1.61                                          | 5.00                 | 6.68                  |

**Table S2.** The refined lattice parameters and reliability factors of Nb-LNCM when Nb<sup>5+</sup> ion occupied the 3a sites (TM layer).

| <b>Concentration<br/>of Nb</b> | $a_{hex}$ (Å) | $c_{hex}$ (Å) | V (Å <sup>3</sup> ) | <b>Occupancy<br/>(Nb<sup>5+</sup> in 3a)</b> | <b>S<br/>(R<sub>wp</sub>/R<sub>exp</sub>)</b> | <b>R<sub>p</sub></b> | <b>R<sub>wp</sub></b> |
|--------------------------------|---------------|---------------|---------------------|----------------------------------------------|-----------------------------------------------|----------------------|-----------------------|
| <b>0.01</b>                    | 2.8509(3)     | 14.2337(4)    | 100.187             | 0                                            | 1.59                                          | 4.94                 | 6.61                  |



**Table S3.** Weight and atomic percentage of Mn, Co, Ni, and Nb elements in Nb-LNCM from the EDS result corresponding to **Fig. S1**.

| <b>Element</b> | <b>Weight %</b> | <b>Atomic %</b> |
|----------------|-----------------|-----------------|
| <b>Mn</b>      | 63.50           | 65.52           |
| <b>Co</b>      | 17.23           | 16.57           |
| <b>Ni</b>      | 17.29           | 16.70           |
| <b>Nb</b>      | 1.98            | 1.21            |
| <b>Totals</b>  | 100.00          | 100.00          |

**Table S4.** Lattice parameters, atomic coordinates, and occupancies for the Rietveld refinement results of the pristine LNCM material.

| <b>Space group: <math>R\bar{3}m</math>, <math>R_p</math>: 4.46, <math>R_{wp}</math>: 6.23, <math>S(R_{wp}/R_{exp})</math>: 2.07</b> |                       |          |          |          |                  |                                 |
|-------------------------------------------------------------------------------------------------------------------------------------|-----------------------|----------|----------|----------|------------------|---------------------------------|
| <b>Atom</b>                                                                                                                         | <b>Wyckoff symbol</b> | <b>x</b> | <b>y</b> | <b>z</b> | <b>Occupancy</b> | <b>Lattice parameter</b>        |
| <b>Li1</b>                                                                                                                          | 3b                    | 0        | 0        | 0.5      | 0.9999           |                                 |
| <b>Li2</b>                                                                                                                          | 3a                    | 0        | 0        | 0        | 0.2              |                                 |
| <b>Ni1</b>                                                                                                                          | 3a                    | 0        | 0        | 0        | 0.1329           | $a_{hex} = 2.8495 \text{ \AA}$  |
| <b>Ni2</b>                                                                                                                          | 3b                    | 0        | 0        | 0.5      | 0.0001           | $c_{hex} = 14.2304 \text{ \AA}$ |
| <b>Mn1</b>                                                                                                                          | 3a                    | 0        | 0        | 0        | 0.533            | $V = 100.070 \text{ \AA}^3$     |
| <b>Co1</b>                                                                                                                          | 3a                    | 0        | 0        | 0        | 0.133            |                                 |
| <b>O1</b>                                                                                                                           | 6c                    | 0        | 0        | 0.2618   | 1                |                                 |

**Table S5.** Lattice parameters, atomic coordinates, and occupancies for the Rietveld refinement results of the pristine Nb-LNCM material.

| <b>Space group: <math>R\bar{3}m</math>, <math>R_p</math>: 4.94, <math>R_{wp}</math>: 6.61, <math>S(R_{wp}/R_{exp})</math>: 1.59</b> |                       |          |          |          |                  |                                 |
|-------------------------------------------------------------------------------------------------------------------------------------|-----------------------|----------|----------|----------|------------------|---------------------------------|
| <b>Atom</b>                                                                                                                         | <b>Wyckoff symbol</b> | <b>x</b> | <b>y</b> | <b>z</b> | <b>Occupancy</b> | <b>Lattice parameter</b>        |
| <b>Li1</b>                                                                                                                          | 3b                    | 0        | 0        | 0.5      | 1                |                                 |
| <b>Li2</b>                                                                                                                          | 3a                    | 0        | 0        | 0        | 0.2              |                                 |
| <b>Ni1</b>                                                                                                                          | 3a                    | 0        | 0        | 0        | 0.13             |                                 |
| <b>Ni2</b>                                                                                                                          | 3b                    | 0        | 0        | 0.5      | 0                | $a_{hex} = 2.8509 \text{ \AA}$  |
| <b>Mn1</b>                                                                                                                          | 3a                    | 0        | 0        | 0        | 0.53             | $c_{hex} = 14.2339 \text{ \AA}$ |
| <b>Co1</b>                                                                                                                          | 3a                    | 0        | 0        | 0        | 0.13             | $V = 100.190 \text{ \AA}^3$     |
| <b>Nb1</b>                                                                                                                          | 3a                    | 0        | 0        | 0        | 0.01             |                                 |
| <b>O1</b>                                                                                                                           | 6c                    | 0        | 0        | 0.2613   | 1                |                                 |

**Table S6.** Curve fitting results for the Mn K-edge EXAFS spectra of LNCM and Nb-LNCM during the 1<sup>st</sup>, 10<sup>th</sup>, 20<sup>th</sup>, and 100<sup>th</sup> discharge.

|                | <b>Bond</b>       | <b>N</b> | <b>Sigma<sup>2</sup><br/>(Å<sup>2</sup>)</b> | <b>R (Å)</b> | <b>S<sub>0</sub><sup>2</sup></b> | <b>Bond strength<br/>(10<sup>2</sup> N m<sup>-1</sup>)</b> |        |
|----------------|-------------------|----------|----------------------------------------------|--------------|----------------------------------|------------------------------------------------------------|--------|
| <b>LNCM</b>    | <b>Pristine</b>   | Mn–O     | 6                                            | 0.00324      | 1.9228                           | 0.73                                                       | 1.2693 |
|                | <b>1D 2.0 V</b>   | Mn–O     | 6                                            | 0.00488      | 1.9159                           | 0.73                                                       | 0.8427 |
|                | <b>10D 2.0 V</b>  | Mn–O     | 6                                            | 0.00553      | 1.9129                           | 0.73                                                       | 0.7437 |
|                | <b>20D 2.0 V</b>  | Mn–O     | 6                                            | 0.00569      | 1.9127                           | 0.73                                                       | 0.7227 |
|                | <b>100D 2.0 V</b> | Mn–O     | 6                                            | 0.00624      | 1.8951                           | 0.73                                                       | 0.6590 |
| <b>Nb-LNCM</b> | <b>Pristine</b>   | Mn–O     | 6                                            | 0.00336      | 1.9146                           | 0.73                                                       | 1.2239 |
|                | <b>1D 2.0 V</b>   | Mn–O     | 6                                            | 0.00434      | 1.9174                           | 0.73                                                       | 0.9476 |
|                | <b>10D 2.0 V</b>  | Mn–O     | 6                                            | 0.00526      | 1.9150                           | 0.73                                                       | 0.7818 |
|                | <b>20D 2.0 V</b>  | Mn–O     | 6                                            | 0.00534      | 1.9129                           | 0.73                                                       | 0.7701 |
|                | <b>100D 2.0 V</b> | Mn–O     | 6                                            | 0.00580      | 1.9020                           | 0.73                                                       | 0.7090 |

**Table S7.** Curve fitting results for the Co K-edge EXAFS spectra of LNCM and Nb-LNCM during the 1<sup>st</sup>, 10<sup>th</sup>, 20<sup>th</sup>, and 100<sup>th</sup> discharge.

|             |                   | <b>Bond</b> | <b>N</b> | <b>Sigma<sup>2</sup></b><br><b>(Å<sup>2</sup>)</b> | <b>R (Å)</b> | <b>S<sub>0</sub><sup>2</sup></b> | <b>Bond strength</b><br><b>(10<sup>2</sup> N m<sup>-1</sup>)</b> |
|-------------|-------------------|-------------|----------|----------------------------------------------------|--------------|----------------------------------|------------------------------------------------------------------|
|             | <b>Pristine</b>   | Co-O        | 6        | 0.00322                                            | 1.9308       | 0.81                             | 1.2771                                                           |
|             | <b>1D 2.0 V</b>   | Co-O        | 6        | 0.00516                                            | 1.9377       | 0.81                             | 0.7970                                                           |
| <b>LNCM</b> | <b>10D 2.0 V</b>  | Co-O        | 6        | 0.00563                                            | 1.9389       | 0.81                             | 0.7304                                                           |
|             | <b>20D 2.0 V</b>  | Co-O        | 6        | 0.00571                                            | 1.9369       | 0.81                             | 0.7202                                                           |
|             | <b>100D 2.0 V</b> | Co-O        | 6        | 0.00688                                            | 1.9344       | 0.81                             | 0.5977                                                           |
|             | <b>Pristine</b>   | Co-O        | 6        | 0.00320                                            | 1.9341       | 0.81                             | 1.2851                                                           |
|             | <b>1D 2.0 V</b>   | Co-O        | 6        | 0.00560                                            | 1.9313       | 0.81                             | 0.7344                                                           |
| <b>Nb-</b>  | <b>10D 2.0 V</b>  | Co-O        | 6        | 0.00599                                            | 1.9443       | 0.81                             | 0.6865                                                           |
| <b>LNCM</b> | <b>20D 2.0 V</b>  | Co-O        | 6        | 0.00613                                            | 1.9393       | 0.81                             | 0.6709                                                           |
|             | <b>100D 2.0 V</b> | Co-O        | 6        | 0.00661                                            | 1.9354       | 0.81                             | 0.6221                                                           |

**Table S8.** Lattice parameters ( $a_{hex}$  and  $c_{hex}$ ), unit cell volume (V), atomic coordinate of oxygen ( $Z_{oxy}$ ), and slab and interslab thickness ( $T_{TMO6}$  and  $T_{LiO6}$ ) for the Rietveld refinement results of the LNCM and Nb-LNCM materials during the 1<sup>st</sup>, 10<sup>th</sup>, 20<sup>th</sup>, and 100<sup>th</sup> cycles. Interslab thickness:  $T_{LiO6} = (c_{hex}/3) - T_{TMO6}$ ; TM slab thickness:  $2(1/3 - Z_{oxy}) * c_{hex}$

|                   | $a_{hex}$ (Å) | $c_{hex}$ (Å) | V (Å <sup>3</sup> ) | $Z_{oxy}$ | $T_{TMO6}$ (Å) | $T_{LiO6}$ (Å) | S ( $R_{wp}/R_{exp}$ ) |
|-------------------|---------------|---------------|---------------------|-----------|----------------|----------------|------------------------|
| <b>Pristine</b>   | 2.8495(7)     | 14.2304(1)    | 100.069             | 0.2618(6) | 2.7092         | 2.0341         | 2.07                   |
| <b>1C 4.4 V</b>   | 2.8367(7)     | 14.3427(1)    | 99.956              | 0.2631(3) | 2.7670         | 2.0138         | 2.64                   |
| <b>1C 4.8 V</b>   | 2.8352(4)     | 14.2792(3)    | 99.406              | 0.2621(3) | 2.7262         | 2.0334         | 2.16                   |
| <b>LNCM</b>       |               |               |                     |           |                |                |                        |
| <b>1D 2.0 V</b>   | 2.8560(7)     | 14.3231(4)    | 101.183             | 0.2617(1) | 2.7226         | 2.0517         | 1.53                   |
| <b>10D 2.0 V</b>  | 2.8572(6)     | 14.3530(2)    | 101.478             | 0.2619(4) | 2.7349         | 2.0494         | 1.93                   |
| <b>20D 2.0 V</b>  | 2.8581(3)     | 14.3698(6)    | 101.657             | 0.2618(3) | 2.7349         | 2.0549         | 2.00                   |
| <b>100D 2.0 V</b> | 2.8614(1)     | 14.3771(2)    | 101.943             | 0.2620(4) | 2.7412         | 2.0511         | 2.16                   |
| <b>Pristine</b>   | 2.8509(2)     | 14.2339(4)    | 100.187             | 0.2613(1) | 2.6942         | 2.0503         | 1.59                   |
| <b>1C 4.4 V</b>   | 2.8371(3)     | 14.3421(2)    | 99.977              | 0.2638(7) | 2.7882         | 1.9925         | 2.48                   |
| <b>1C 4.8 V</b>   | 2.8373(5)     | 14.3610(6)    | 100.125             | 0.2624(4) | 2.7508         | 2.0362         | 2.15                   |
| <b>Nb-LNCM</b>    |               |               |                     |           |                |                |                        |
| <b>1D 2.0 V</b>   | 2.8554(9)     | 14.3301(7)    | 101.191             | 0.2618(7) | 2.7285         | 2.0481         | 1.55                   |
| <b>10D 2.0 V</b>  | 2.8565(9)     | 14.3547(8)    | 101.442             | 0.2620(9) | 2.7395         | 2.0453         | 1.84                   |
| <b>20D 2.0 V</b>  | 2.8571(3)     | 14.3645(3)    | 101.550             | 0.2621(3) | 2.7425         | 2.0456         | 1.86                   |
| <b>100D 2.0 V</b> | 2.8593(3)     | 14.3728(6)    | 101.765             | 0.2623(4) | 2.7501         | 2.0407         | 1.72                   |
